# Supplementary material
Source: Springer Nature journal article supplement (https://www.springermedizin.de/resource/supplementary/12889_2011_4023_MOESM3_ESM.pdf/9490982)

### Mental health by gender

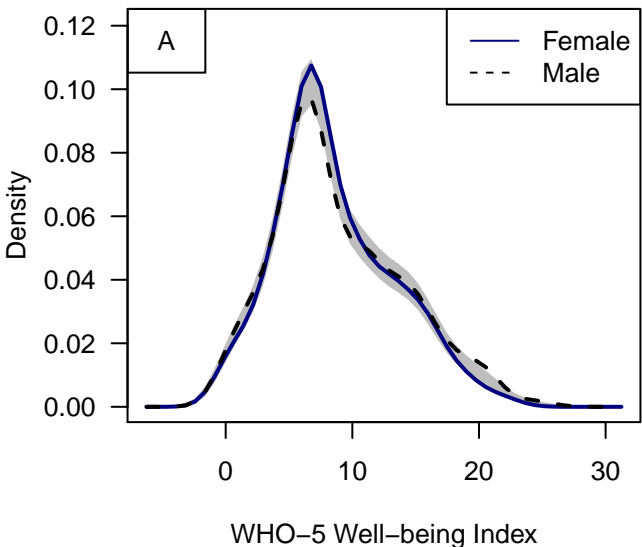

### Mental health by wealth group

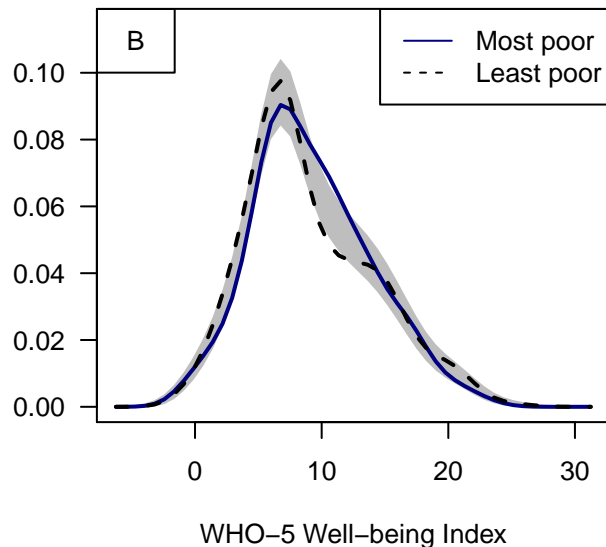

### Mental health by self rated health

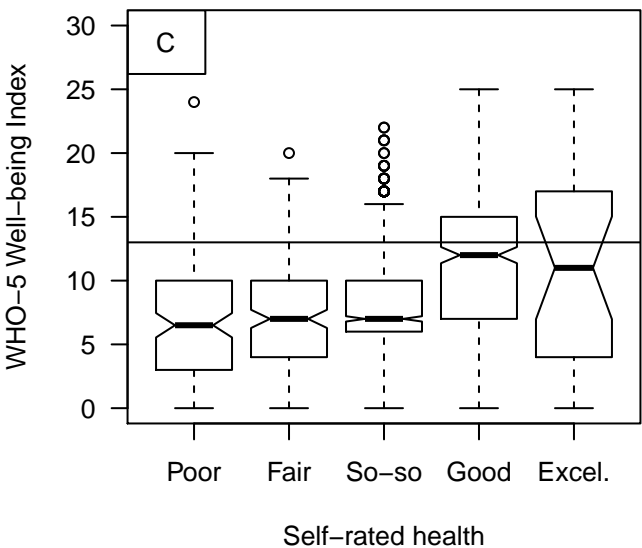

### Mental health by disease

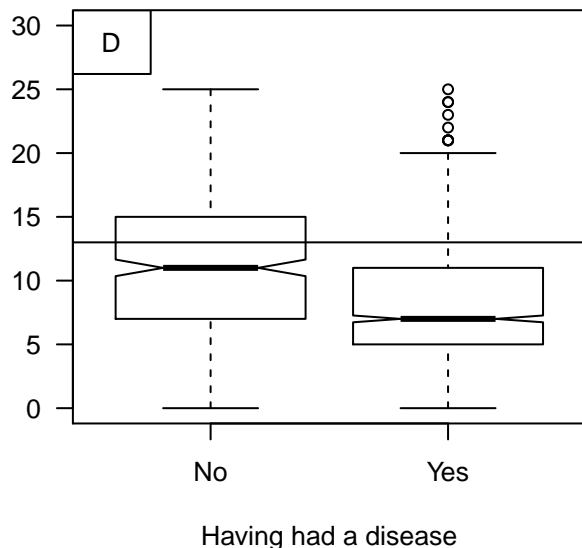

Supplement: MOESM3 [file 9490982]
